# Supplementary material
Source: publisher figshare collection journal article supplement (https://acs.figshare.com/ndownloader/files/13005302)
Supplement: Supplementary file 1 [file 13005302]

**Supporting Information**

**for**

**Metal Oxide Nanoparticles with Dopant-Segregation-Induced Core-Shell**

**Structure: Gas Sensing Properties**

Jiansong Miao<sup>a</sup>, Chuan Chen<sup>b</sup>, Y.S. Lin<sup>a,\*</sup>

a School for Engineering of Matter, Transport and Energy, Arizona State University, Tempe, AZ 85287, USA

b Global Energy Interconnection Research Institute co., Ltd., Future Technology Park, Changping district, Beijing, China, 102211

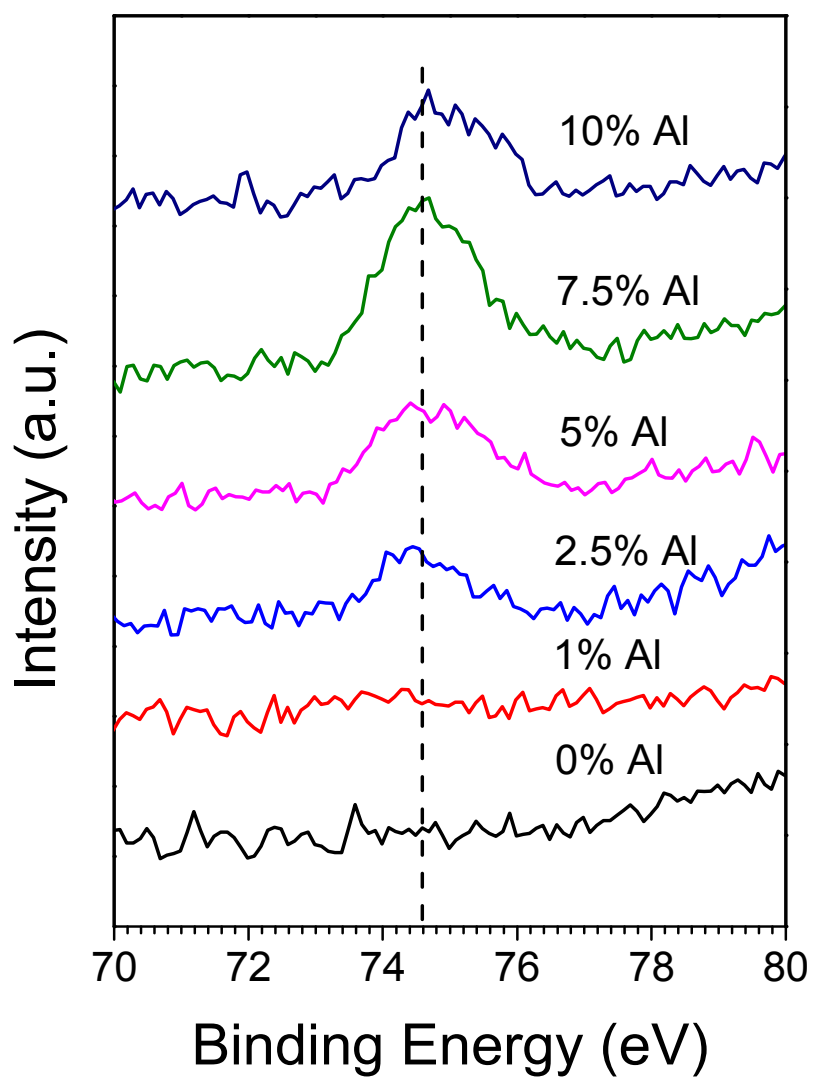

*Figure S- 1 high-resolution XPS spectra at binding energies corresponding to the Al 2p.*

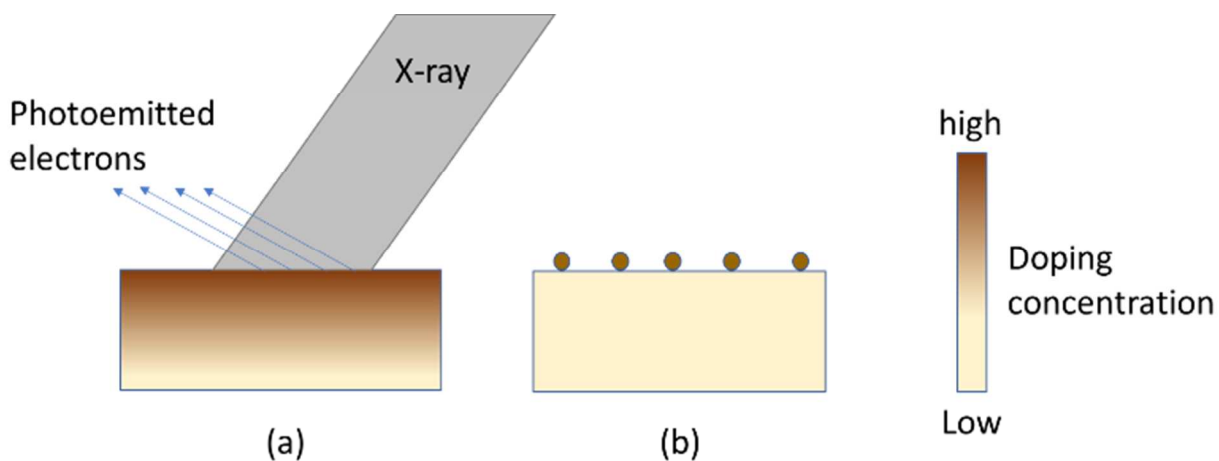

*Figure S- 2 (a) high level of dopant segregation on the surface, therefore, the dopant concentration measured by XPS is much higher than theoretical doping concentration; (b) nucleation of Al-rich particles, surface with low dopant concentration exposed.*

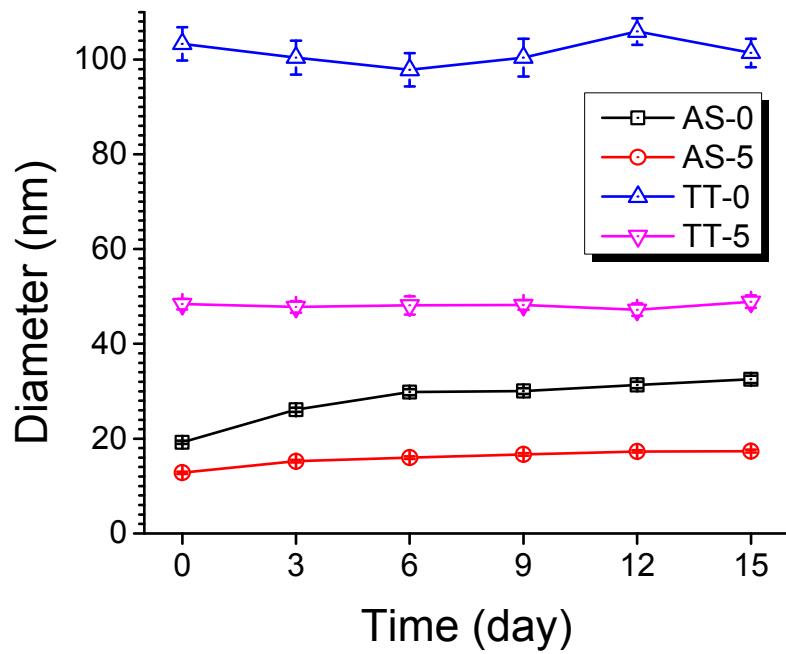

Figure S- 3 crystallite size of as-synthesized samples with 0 and 5 mol% doping concentration (AS-0 & AS-5) and thermally-treated samples with 0 and 5 mol% doping concentration (TT-0 & TT-5) as a function of time at 400 °C.

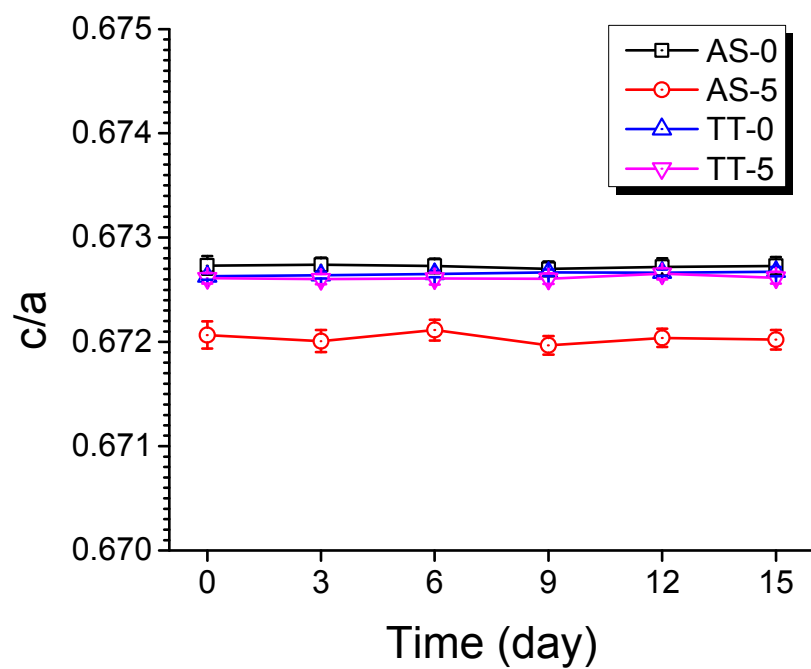

Figure S- 4  $c/a$  ratio of as-synthesized samples with 0 and 5 mol% doping concentration (AS-0 & AS-5) and thermally-treated samples with 0 and 5 mol% doping concentration (TT-0 & TT-5) as a function of time at 400 °C.
